# Supplementary material
Source: Springer Nature journal article supplement (https://www.springerprofessional.de/resource/supplementary/13673_2012_31_MOESM2_ESM.pdf/11899394)
Supplement: MOESM2 [file 11899394]

Function `travel_document(document  $d$ )` begin

Recognize that  $d$  as a visited object resource;

Add a node  $dc$  is a child node of  $d$ ; /\* the node  $dc$  is a pseudo node represents the inter-relationship \*/

For each document  $d'$  which  $d$  hyperlink to begin

If the type of  $dc$  is NOT defined then begin

    Add a property `rdf:type` of  $dc$  which is a “type object” `rdf:bag`;

end;

Add relationship from  $d$  to  $d'$  with form of property of  $dc$ ;

if  $d'$  has not been visited begin

`travel_document( $d'$ )`;

end;

end;

end.

Function `MAIN(Web document set  $S$ )` begin /\*  $S$  is input of web document set for discovering schema \*/

while there exists a document  $d$  in set  $S$  not be visited begin

`travel_document( $d$ )`;

end;

end.
